# Supplementary material for: Applying polygenic risk scoring for psychiatric disorders to a large family with bipolar disorder and major depressive disorder
Source: PubMed Central journal article supplement (PMC6175827; doi:10.1038/s42003-018-0155-y), 2018-10-08
Supplement: 42003_2018_155_MOESM1_ESM.pdf [file 42003_2018_155_MOESM1_ESM.pdf]

## SUPPLEMENTARY FIGURES

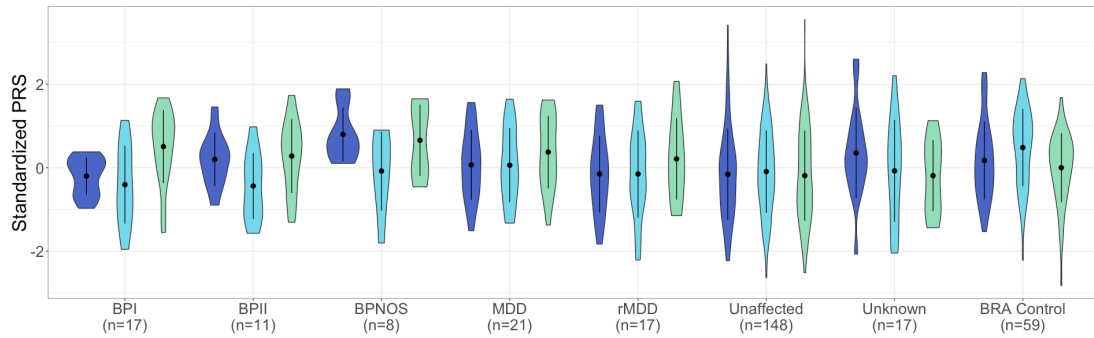

### Supplementary Figure 1

Violin plots of SCZ:PRS (based on 1,218 SNPs, dark blue plots) MDD:PRS (based on 715 SNPs, light blue plots) and BPD:PRS (based on 143 SNPs, green plots) over diagnostic categories. The first three boxes represent individuals suffering from bipolar disorder I, II or NOS. The next two boxes individuals suffering from MDD or recurrent MDD, followed by the unaffected and unknown individuals and the healthy Brazilian controls. The dot and error bars represent mean  $\pm$  standard deviation of standardized PRSs.

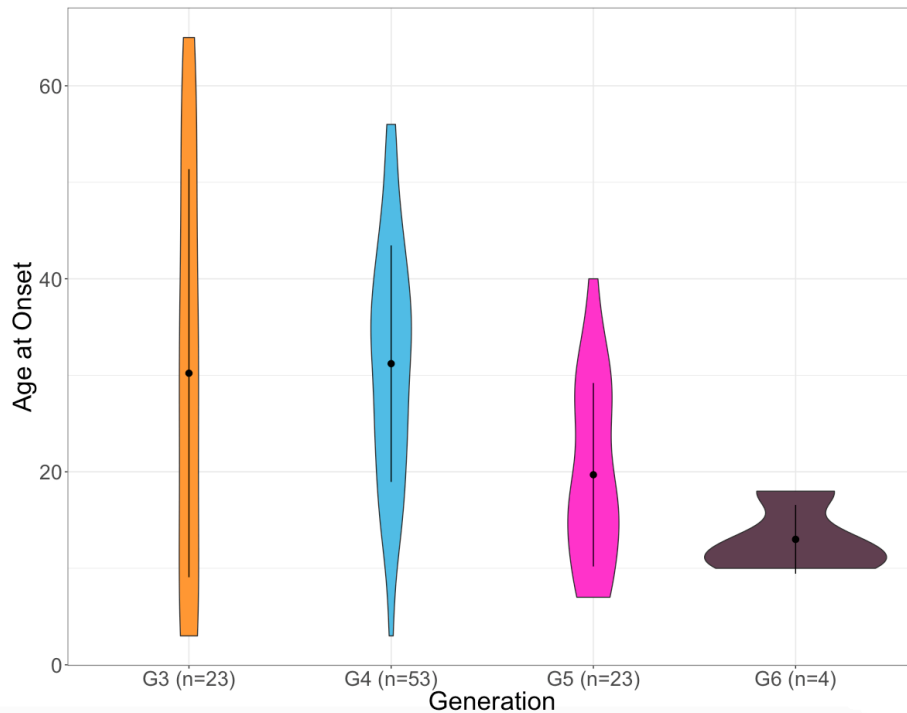

### Supplementary Figure 2

Violin plot with generation on the x-axis and the age at onset on the y-axis for affected family members for Generation 3 (orange), 4 (light blue), 5 (pink) and the second-youngest generation 6 (dark purple). The oldest generation G2 and youngest generation G7 were omitted due to small (n=2) sample size. The dot and error bars represent mean  $\pm$  standard deviation of standardized PRSs. All family members have been included in the study around the same time, therefore this is reflected in the age distribution per generation of genotyped individuals irrespective of affection status with G2 (n=2, age=93.5 $\pm$ 12.0), G3 (n=36, age=67.9yrs $\pm$ 9.5), G4 (n=101, age=44.5yrs $\pm$ 8.5), G5 (n=84, age=20.3yrs $\pm$ 10.0), G6 (n=18, age=10.3yrs $\pm$ 7.0) and G7 (n=2, age=1.5yrs $\pm$ 0.7).

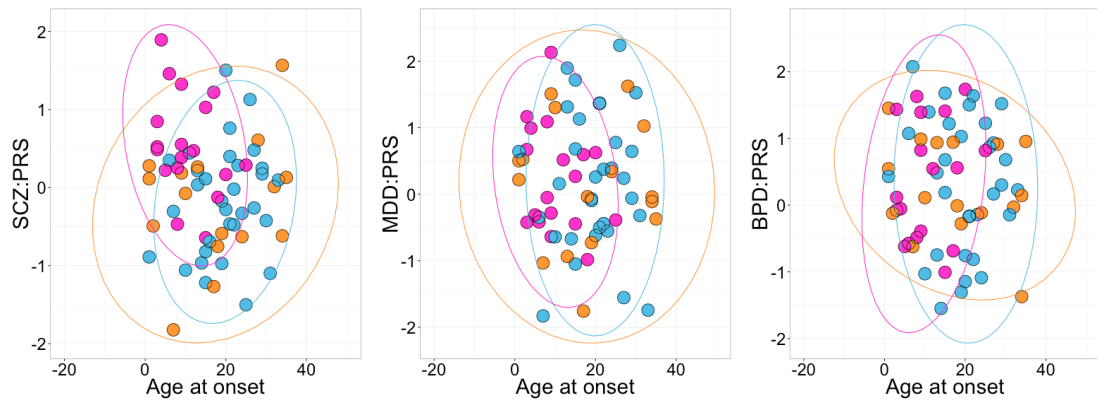

### Supplementary Figure 3

The age at onset on the x-axis and standardized SCZ:PRS, MDD:PRS and BPD:PRS respectively on the y-axis for affected family members only. Individuals are colored by generation (G3 in orange, G4 in blue, and G5 in pink). Data ellipses represent 95% confidence intervals for each generation. (excluding the oldest generation G2 and youngest generations G6 and G7 because small number of affected members in these generations).

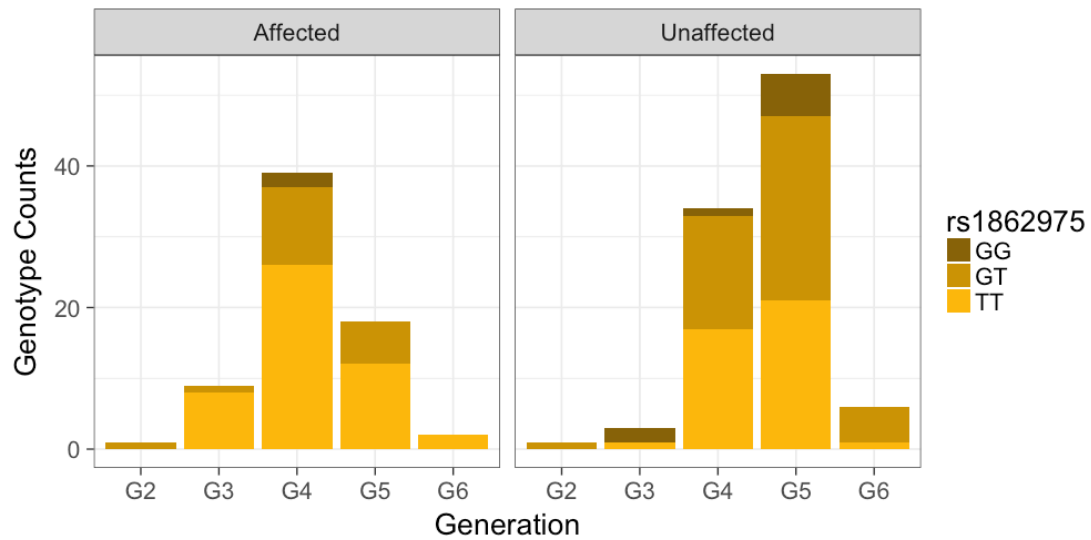

#### Supplementary Figure 4

Stacked barplots showing the genotype distributions of the linkage risk SNP over five generations for affected and unaffected family members (excluding married-in individuals). The left plot shows the genotype distribution of rs1862975 in n=69 affected family members, and n=97 unaffected family members. Statistical testing excluded G2 and G6 because of limited number of individuals with genotypic data available.

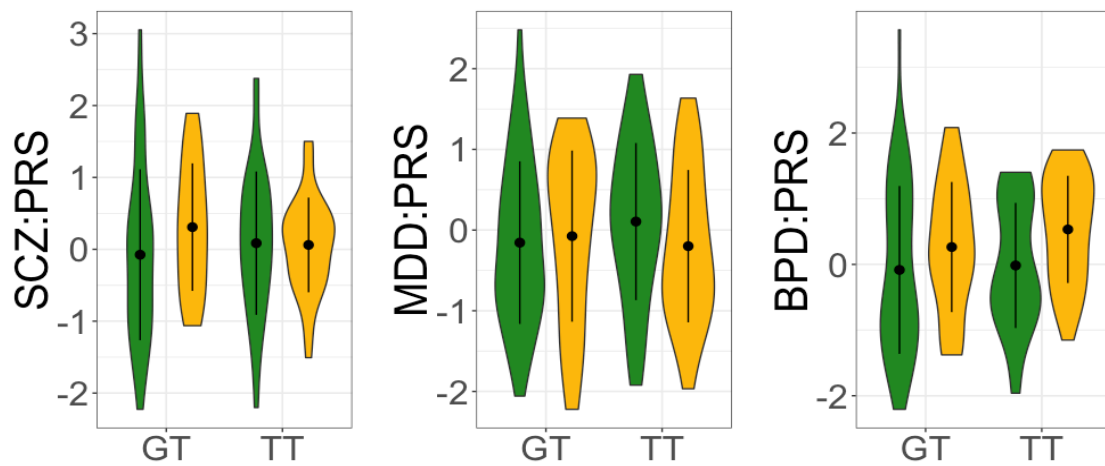

**Supplementary Figure 5**

Violin plots of PRS for groups carrying different linkage risk SNP genotypes in the overlapping dataset of n=60 affected (displayed in orange) and n=100 unaffected individuals (displayed in green). As only n=2 affected individuals carry the GG genotype, only GT (n=21 affected and n=54 unaffected and TT (n=37 affected and n=32 unaffected individuals) genotypes are displayed and included in statistical tests.

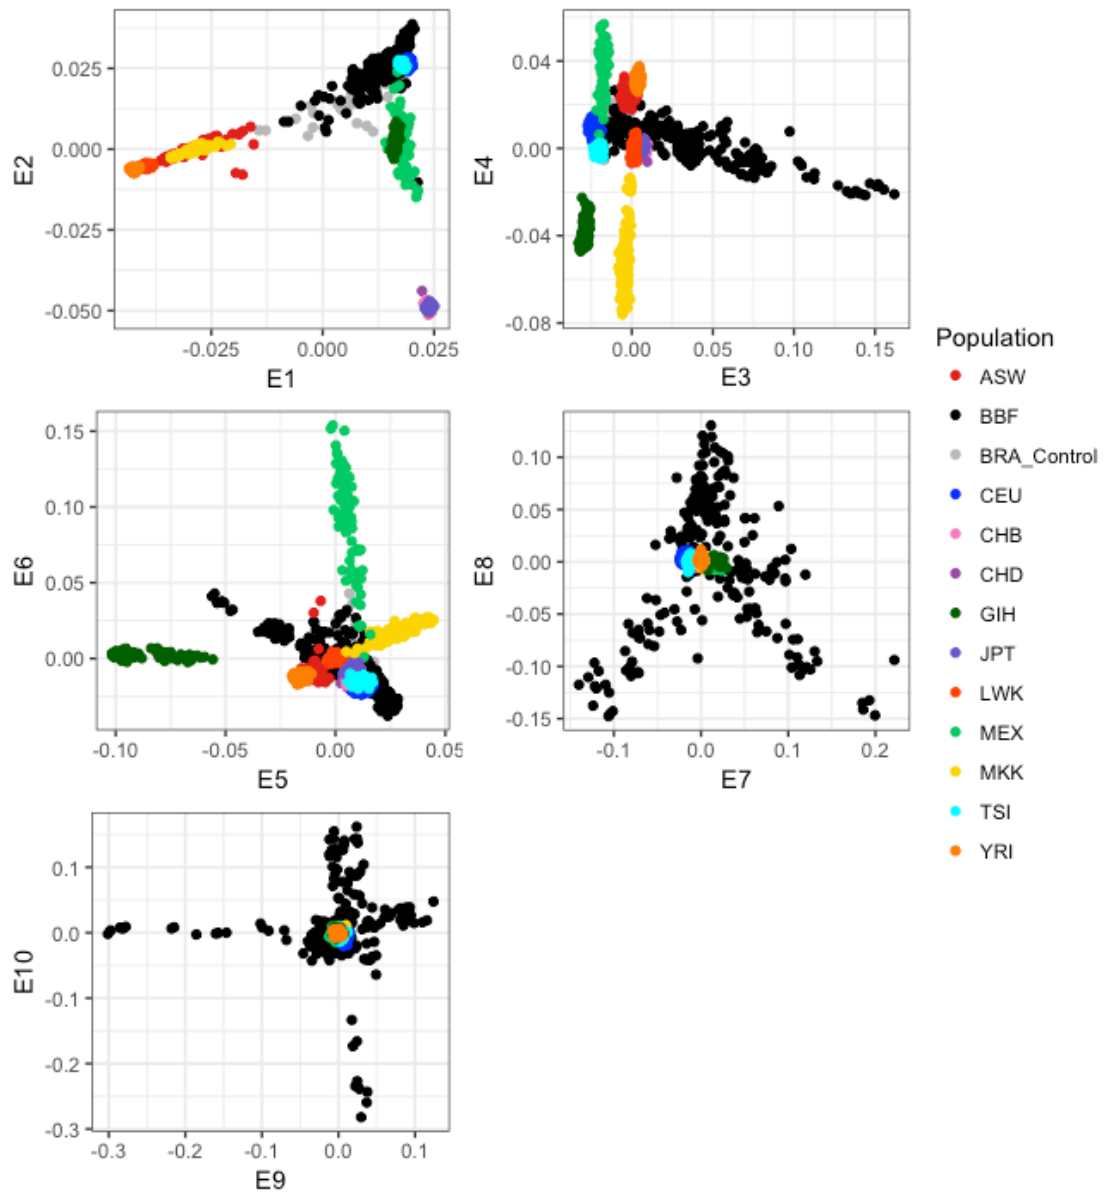

**Supplementary Figure 6**

Scatterplots of the first 10 principal components colored by Hapmap3 populations, BBF family members (black) and Brazilian population controls (grey). The BBF and BRA controls cluster together with European CEU and TSI populations, while showing some variation towards African populations when looking at the first two principal components.

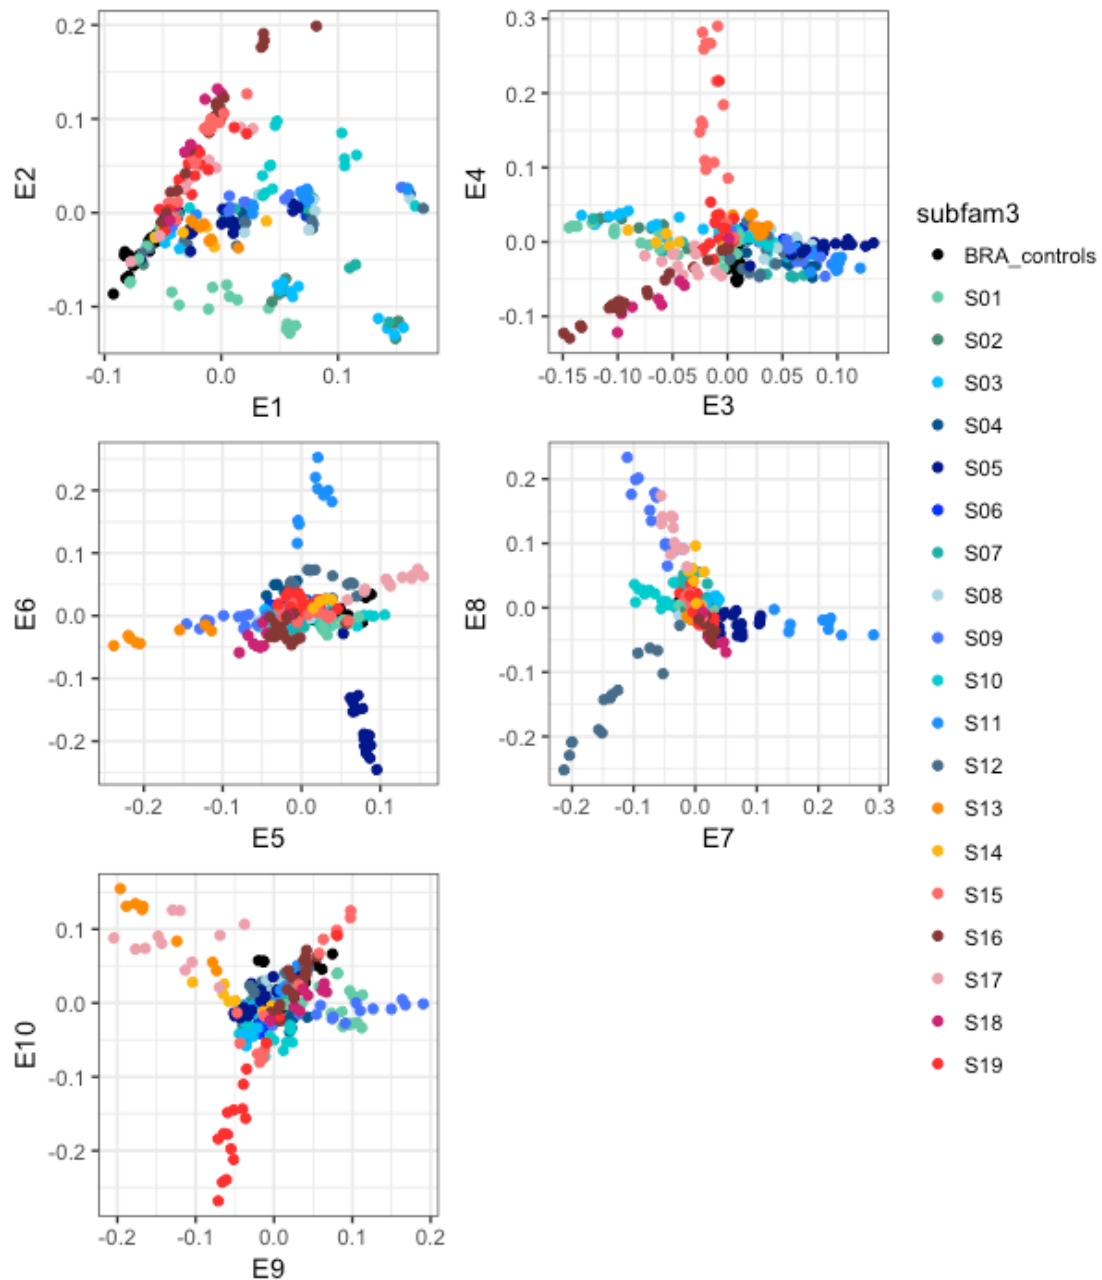

### Supplementary Figure 7

Scatterplots of the first 10 principal components colored by the 19 Brazilian Bipolar family subfamilies and the Brazilian population controls in black. Subfamily 1-12 (in blue hues) belong to Branch 1, subfamily 13 and 14 (orange hues) to Branch 2 and subfamily 15-19 (red hues) to Branch 3. Principal components seemingly group together subfamilies within the BBF.

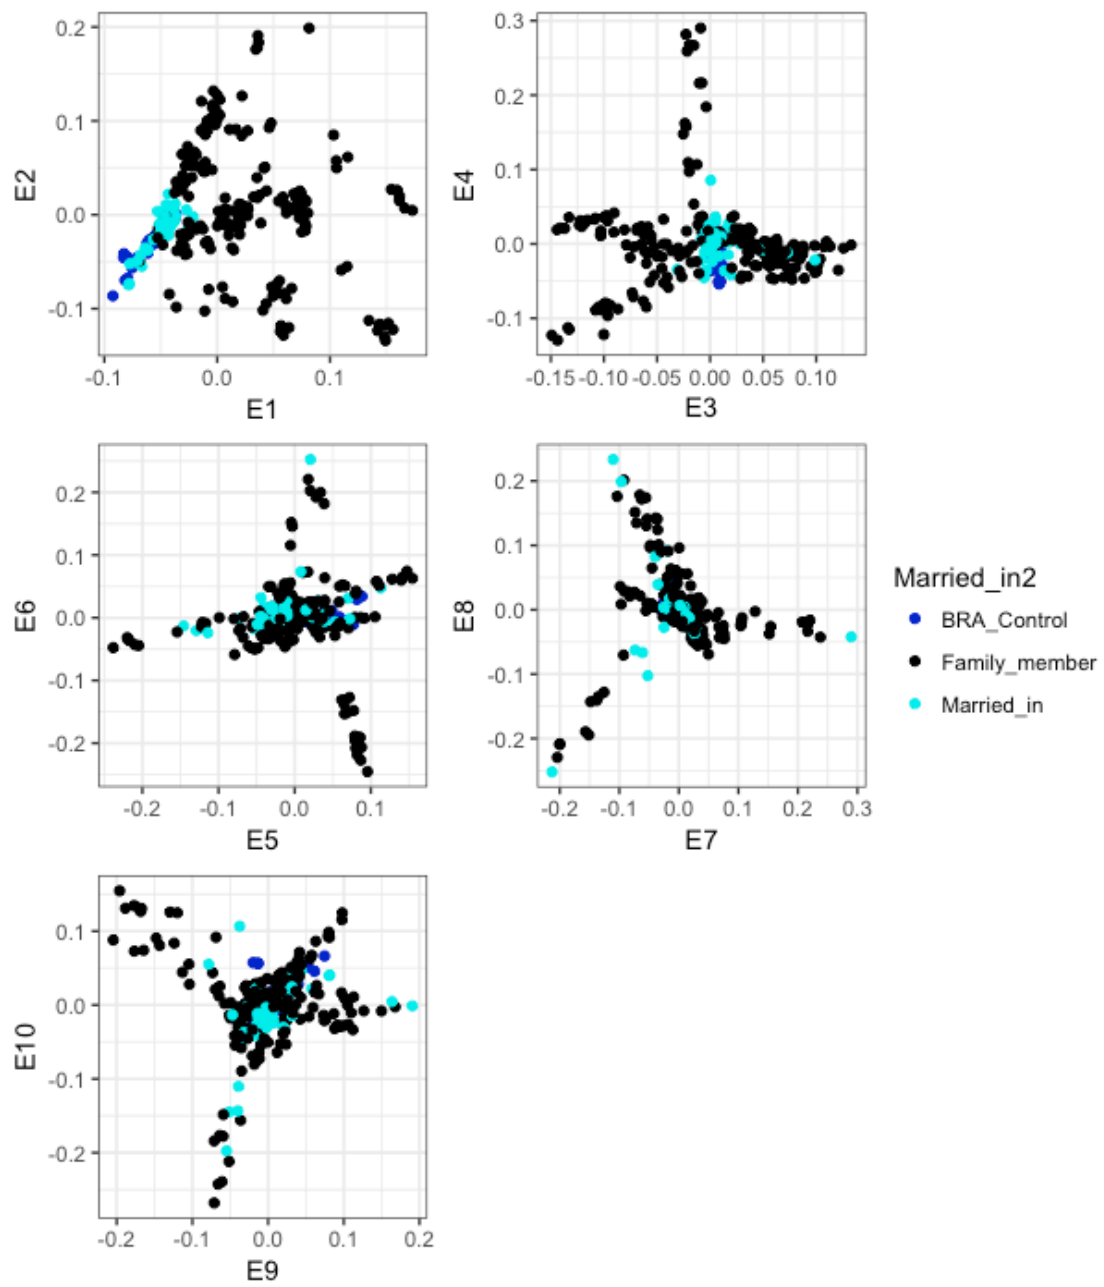

### Supplementary Figure 8

Scatterplots of the first 10 principal components colored by the Brazilian Bipolar Family members in black, married-ins in light blue and Brazilian controls in dark blue.



## SUPPLEMENTARY TABLES

### Supplementary Table 1

Number of children contributed per spouse pair to each offspring category.

| Number of children<br>contributed per spouse pair | 0_aff | 1_InFam_aff | L_MarriedIn_af | 2_aff | Unknown | BRA Controls |
|---------------------------------------------------|-------|-------------|----------------|-------|---------|--------------|
| 0                                                 | 80    | 71          | 104            | 98    | 99      | 112          |
| 1                                                 | 17    | 26          | 5              | 7     | 7       | 0            |
| 2                                                 | 13    | 10          | 2              | 2     | 4       | 0            |
| 3                                                 | 1     | 2           | 2              | 4     | 2       | 0            |
| 4                                                 | 2     | 3           | 0              | 0     | 0       | 0            |
| 5                                                 | 0     | 1           | 0              | 0     | 0       | 0            |
| 6                                                 | 0     | 0           | 0              | 0     | 0       | 0            |
| 7                                                 | 0     | 0           | 0              | 1     | 0       | 0            |
| 8                                                 | 0     | 0           | 0              | 1     | 0       | 0            |

## Supplementary Table 2

Demographics of the offspring of different spouse pairs (no affected parents, 1 affected family member parent, 1 affected married-in parent and offspring of two affected parents). A breakdown of gender, age, age of onset is given in the next columns.

| Parental spousepair          | n  | Male, Female | Age ( $\pm$ sd)    | Affected, Unaffected, Unknown | Age of onset ( $\pm$ sd) |
|------------------------------|----|--------------|--------------------|-------------------------------|--------------------------|
| <b>0 Affected</b>            | 54 | 39, 15       | 28.6 ( $\pm$ 21.6) | 8, 36, 10                     | 28.7 ( $\pm$ 16.4)       |
| <b>1 In Fam affected</b>     | 69 | 41, 28       | 31.0 ( $\pm$ 18.6) | 23, 39, 7                     | 26.4 ( $\pm$ 14.0)       |
| <b>1 Married-in affected</b> | 15 | 4, 11        | 25.7 ( $\pm$ 10.5) | 7, 7, 1                       | 18.0 ( $\pm$ 10.3)       |
| <b>2 Affected</b>            | 38 | 20, 18       | 40.0 ( $\pm$ 18.9) | 21, 17, 0                     | 27.4 ( $\pm$ 15.1)       |
| <b>Unknown</b>               | 67 | 32, 35       | 51.8 ( $\pm$ 17.7) | 19, 48                        | 34.5 ( $\pm$ 17.7)       |

### Supplementary Table 3

Comparison of linear models performed in this study with and without inclusion of 'subfamily membership' as a fixed effect.

|                                         | SCZ:PRS (analysis as in paper) |       |         |         | SCZ:PRS (incl. subfamily) |       |         |         |
|-----------------------------------------|--------------------------------|-------|---------|---------|---------------------------|-------|---------|---------|
|                                         | Beta                           | SE    | Z-ratio | p-value | Beta                      | SE    | Z-ratio | p-value |
| <b>PRS &amp; Affection Status</b>       |                                |       |         |         |                           |       |         |         |
| Affected vs Unaffected                  | 0.069                          | 0.032 | 2.117   | 0.035   | 0.059                     | 0.034 | 1.172   | 0.088   |
| Psychosis vs Unaffected                 | 0.029                          | 0.023 | 1.295   | 0.197   | 0.019                     | 0.024 | 0.801   | 0.425   |
| <b>PRS &amp; Offspring</b>              |                                |       |         |         |                           |       |         |         |
| 2 affected vs 0 affected parents        | 0.064                          | 0.083 | 0.769   | 0.446   | 0.028                     | 0.127 | 0.216   | 0.83    |
| Fam affected vs 0 affected parents      | 0.076                          | 0.061 | 1.252   | 0.215   | 0.071                     | 0.07  | 1.014   | 0.317   |
| MI affected vs 0 affected parents       | 0.209                          | 0.064 | 3.288   | 0.002   | 0.308                     | 0.117 | 2.634   | 0.0151  |
| <b>PRS &amp; Generations</b>            |                                |       |         |         |                           |       |         |         |
| G3, G4, G5, G6                          | 0.131                          | 0.049 | 2.668   | 0.008   | 0.089                     | 0.05  | 1.79    | 0.075   |
| <b>PRS &amp; Age at Onset</b>           |                                |       |         |         |                           |       |         |         |
| AAO vs PRS                              | 2.093                          | 2.374 | 0.882   | 0.381   | 0.7                       | 2.693 | 0.26    | 0.796   |
| <b>rs1862975 TT genotypes &amp; PRS</b> |                                |       |         |         |                           |       |         |         |
| Affecteds                               | 0.02                           | 0.111 | 0.181   | 0.857   | -0.108                    | 0.115 | -0.943  | 0.35    |
| Unaffecteds                             | -0.01                          | 0.038 | -0.257  | 0.797   | -0.031                    | 0.04  | -0.76   | 0.449   |

|                                         | MDD:PRS (analysis as in paper) |       |         |         | MDD:PRS (incl. subfamily) |       |         |         |
|-----------------------------------------|--------------------------------|-------|---------|---------|---------------------------|-------|---------|---------|
|                                         | Beta                           | SE    | Z-ratio | p-value | Beta                      | SE    | Z-ratio | p-value |
| <b>PRS &amp; Affection Status</b>       |                                |       |         |         |                           |       |         |         |
| Affected vs Unaffected                  | -0.0201                        | 0.034 | -0.597  | 0.551   | -0.029                    | 0.036 | -0.807  | 0.421   |
| Psychosis vs Unaffected                 | -0.004                         | 0.024 | -0.16   | 0.873   | -0.012                    | 0.025 | -0.466  | 0.641   |
| <b>PRS &amp; Offspring</b>              |                                |       |         |         |                           |       |         |         |
| 2 affected vs 0 affected parents        | 0.076                          | 0.075 | 1.02    | 0.313   | 0.088                     | 0.114 | 0.768   | 0.449   |
| Fam affected vs 0 affected parents      | 0.093                          | 0.063 | 1.491   | 0.141   | 0.089                     | 0.076 | 1.164   | 0.25    |
| MI affected vs 0 affected parents       | 0.081                          | 0.074 | 1.101   | 0.277   | 0.188                     | 0.09  | 2.089   | 0.048   |
| <b>PRS &amp; Generations</b>            |                                |       |         |         |                           |       |         |         |
| G3, G4, G5, G6                          | 0.07                           | 0.045 | 1.548   | 0.123   | 0.059                     | 0.047 | 1.251   | 0.212   |
| <b>PRS &amp; Age at Onset</b>           |                                |       |         |         |                           |       |         |         |
| AAO vs PRS                              | 0.113                          | 1.866 | 0.061   | 0.952   | 0.595                     | 2.099 | 0.286   | 0.778   |
| <b>rs1862975 TT genotypes &amp; PRS</b> |                                |       |         |         |                           |       |         |         |
| Affecteds                               | 0.097                          | 0.086 | 1.123   | 0.265   | 0.097                     | 0.09  | 1.071   | 0.289   |
| Unaffecteds                             | -0.016                         | 0.037 | -0.423  | 0.673   | -0.013                    | 0.04  | -0.313  | 0.755   |

|                                         | BPD:PRS (analysis as in paper) |       |         |         | BPD:PRS (incl. subfamily) |       |         |         |
|-----------------------------------------|--------------------------------|-------|---------|---------|---------------------------|-------|---------|---------|
|                                         | Beta                           | SE    | Z-ratio | p-value | Beta                      | SE    | Z-ratio | p-value |
| <b>PRS &amp; Affection Status</b>       |                                |       |         |         |                           |       |         |         |
| Affected vs Unaffected                  | 0.094                          | 0.03  | 3.123   | 0.002   | 0.066                     | 0.034 | 1.949   | 0.053   |
| Psychosis vs Unaffected                 | 0.033                          | 0.021 | 1.551   | 0.123   | 0.01                      | 0.024 | 0.428   | 0.669   |
| <b>PRS &amp; Offspring</b>              |                                |       |         |         |                           |       |         |         |
| 2 affected vs 0 affected parents        | 0.141                          | 0.071 | 1.977   | 0.05    | 0.134                     | 0.088 | 1.527   | 0.138   |
| Fam affected vs 0 affected parents      | 0.054                          | 0.061 | 0.89    | 0.377   | 0.01                      | 0.076 | 0.133   | 0.895   |
| MI affected vs 0 affected parents       | 0.172                          | 0.066 | 2.613   | 0.013   | 0.069                     | 0.092 | 0.756   | 0.457   |
| <b>PRS &amp; Generations</b>            |                                |       |         |         |                           |       |         |         |
| G3, G4, G5, G6                          | 0.033                          | 0.044 | 0.747   | 0.457   | 0.012                     | 0.045 | 0.261   | 0.795   |
| <b>PRS &amp; Age at Onset</b>           |                                |       |         |         |                           |       |         |         |
| AAO vs PRS                              | -1.563                         | 1.898 | -0.823  | 0.414   | -3.63                     | 2.031 | -1.787  | 0.08    |
| <b>rs1862975 TT genotypes &amp; PRS</b> |                                |       |         |         |                           |       |         |         |
| Affecteds                               | -0.027                         | 0.091 | -0.03   | 0.765   | -0.01                     | 0.095 | -0.101  | 0.92    |
| Unaffecteds                             | 0.019                          | 0.035 | 0.531   | 0.596   | 0.025                     | 0.038 | 0.656   | 0.513   |

## Supplementary Table 4

List of tests performed. We have performed 42 tests setting a conservative Bonferroni correction at  $P < 0.05/42 = 0.001$ .

|                                                           | Covariates            | Random effects      | Notes                                                         |
|-----------------------------------------------------------|-----------------------|---------------------|---------------------------------------------------------------|
| <b>PRS &amp; Affection Status (2x3 tests)</b>             |                       |                     |                                                               |
| Affected vs Unaffected                                    | Age, Gender           | genetic relatedness |                                                               |
| Psychosis vs Unaffected                                   | Age, Gender           | genetic relatedness |                                                               |
| <b>PRS &amp; Marriedins (1x3 tests)</b>                   |                       |                     |                                                               |
| Unaffected MI vs BRA controls                             | Age, Gender           |                     |                                                               |
| <b>PRS &amp; Offspring (3x3 tests)</b>                    |                       |                     |                                                               |
| 2 affected vs 0 affected parents                          | Generation            | genetic relatedness | Mean of siblings per parent pair when >1 offspring            |
| Fam affected vs 0 affected parents                        | Generation            | genetic relatedness | Mean of siblings per parent pair when >1 offspring            |
| MI affected vs 0 affected parents                         | Generation            | genetic relatedness | Mean of siblings per parent pair when >1 offspring            |
| <b>PRS &amp; Generations (1x3 tests)</b>                  |                       |                     |                                                               |
| G3, G4, G5, G6                                            | Gender                | genetic relatedness | Family members only                                           |
| <b>PRS &amp; Age at Onset (1x3 test)</b>                  |                       |                     |                                                               |
| AAO vs PRS                                                | Age, Gender           | genetic relatedness |                                                               |
| <b>PRS &amp; Spouse pairs (2x3 tests)</b>                 |                       |                     |                                                               |
| All spousepairs                                           | Age, Gender           |                     |                                                               |
| Concordant only                                           | Age, Gender           |                     |                                                               |
| <b>Linkage region TDT test (1 test)</b>                   |                       |                     |                                                               |
| All available data                                        |                       |                     | Combination of Affymetrix and Illumina data                   |
| <b>rs1862975 TT genotypes &amp; Generations (2 tests)</b> |                       |                     |                                                               |
| Affecteds                                                 | Gender                | genetic relatedness | Family members only                                           |
| Unaffecteds                                               | Gender                | genetic relatedness | Family members only                                           |
| <b>rs1862975 TT genotypes &amp; PRS (2x3 tests)</b>       |                       |                     |                                                               |
| Affecteds                                                 | Age, Gender           | genetic relatedness |                                                               |
| Unaffecteds                                               | Age, Gender           | genetic relatedness |                                                               |
| <b>Phenotypic (3 tests)</b>                               |                       |                     |                                                               |
| Prevalence married-ins vs population                      |                       |                     | tested in pedigree irrespective of having genotypes available |
| Age at onset vs Generation                                | Gender                |                     | tested in pedigree irrespective of having genotypes available |
| Number of offspring vs Generation                         | Affection status, PRS |                     | tested in pedigree irrespective of having genotypes available |



## SUPPLEMENTARY METHODS

### Supplementary Methods 1: Linear mixed model as performed in this study.

```
modella <- asreml(fixed= affection_status ~ 1 + Gender + Age + zPRS,  
                 random= ~giv(kinship matrix),  
                 ginverse=list(kinship matrix=Ginv),  
                 data= bbfddata,  
                 na.method.X="omit", na.method.Y="omit")  
  
wald.asreml(modella, ssType="conditional", denDF="numeric")
```
